# Supplementary material for: Cluster of differentiation 33 single nucleotide polymorphism rs12459419 is a predictive factor in patients with nucleophosmin1-mutated acute myeloid leukemia receiving gemtuzumab ozogamicin
Source: PubMed Central journal article supplement — Haematologica. 2021 May 27;106(11):2986–9. doi: 10.3324/haematol.2021.278894 (PMC8561276; doi:10.3324/haematol.2021.278894), 2021-05-27

**Cluster of differentiation 33 single nucleotide polymorphism rs12459419 is a predictive factor in patients with nucleophosmin1-mutated acute myeloid leukemia receiving gemtuzumab ozogamicin**

Katrin Teich,<sup>1</sup> Julia Krzykalla,<sup>2</sup> Silke Kapp-Schwoerer,<sup>3</sup> Verena I. Gaidzik,<sup>3</sup> Richard F. Schlenk,<sup>4,5</sup> Peter Paschka,<sup>3</sup> Daniela Weber,<sup>3</sup> Walter Fiedler,<sup>6</sup> Michael W. M. Kühn,<sup>7</sup> Thomas Schroeder,<sup>8</sup> Karin Mayer,<sup>9</sup> Michael Lübbert,<sup>10</sup> Dhanya Ramachandran,<sup>11</sup> Axel Benner,<sup>2</sup> Arnold Ganser,<sup>1</sup> Hartmut Döhner,<sup>3</sup> Michael Heuser,<sup>1</sup> Konstanze Döhner<sup>3</sup> and Felicitas Thol<sup>1</sup>

<sup>1</sup>Department of Hematology, Hemostaseology, Oncology, and Stem Cell Transplantation, Hannover Medical School, Hannover; <sup>2</sup>Division of Biostatistics, German Cancer Research Center Heidelberg, Heidelberg; <sup>3</sup>Department of Internal Medicine III, University Hospital of Ulm, Ulm; <sup>4</sup>Nationales Centrum für Tumorerkrankungen Trial Center, National Center of Tumor Diseases, German Cancer Research Center, Heidelberg; <sup>5</sup>Department of Internal Medicine V, Heidelberg University Hospital, Heidelberg; <sup>6</sup>Department of Internal Medicine II, University Medical Center Hamburg-Eppendorf, Hamburg; <sup>7</sup>Department of Hematology, Medical Oncology and Pneumology, University Medical Center Mainz, Mainz; <sup>8</sup>Department of Hematology, Oncology, and Clinical Immunology, University of Düsseldorf, Medical Faculty, Düsseldorf; <sup>9</sup>Internal Medicine III, University Hospital of Bonn, Bonn; <sup>10</sup>Klinik für Innere Medizin I, Universitätsklinikum Freiburg, Faculty of Medicine, Freiburg and <sup>11</sup>Department Molecular Gynecology, Hannover Medical School, Hannover, Germany

Correspondence: KATRIN TEICH - teich.katrin@mh-hannover.de

doi:10.3324/haematol.2021.278894

## Supplemental Data

**Supplemental Table 1:** Patient and disease characteristics according to randomization and CD33 genotype.

| Parameter                      | Standard arm          |                       |                      | GO arm                |                       |                      |
|--------------------------------|-----------------------|-----------------------|----------------------|-----------------------|-----------------------|----------------------|
|                                | CC<br>(N=123,<br>45%) | CT<br>(N=120,<br>44%) | TT<br>(N=29,<br>11%) | CC<br>(N=128,<br>46%) | CT<br>(N=127,<br>45%) | TT<br>(N=18,<br>9%)  |
| <b>Age (years)</b>             |                       |                       |                      |                       |                       |                      |
| Mean (SD)                      | 57.3 (12.6)           | 58.0 (12.7)           | 57.0 (15.3)          | 58.0 (12.1)           | 58.3 (11.7)           | 61.9 (14.1)          |
| Median [Min, Max]              | 57.6<br>[20.9, 77.3]  | 58.6<br>[21.9, 78.4]  | 60.7<br>[22.1, 80.2] | 57.6<br>[25.7, 78.3]  | 59.9<br>[19.3, 82.3]  | 62.8<br>[18.4, 76.2] |
| <b>Sex</b>                     |                       |                       |                      |                       |                       |                      |
| Male                           | 55 (45%)              | 57 (47%)              | 17 (59%)             | 63 (49%)              | 48 (38%)              | 8 (44%)              |
| Female                         | 68 (55%)              | 63 (53%)              | 12 (41%)             | 65 (51%)              | 79 (62%)              | 10 (56%)             |
| <b>ECOG performance status</b> |                       |                       |                      |                       |                       |                      |
| 0                              | 48 (39%)              | 42 (35%)              | 11 (38%)             | 37 (29%)              | 49 (39%)              | 6 (33.3%)            |
| 1                              | 62 (50%)              | 65 (54%)              | 15 (52%)             | 79 (62%)              | 66 (52%)              | 6 (33.3%)            |
| 2                              | 13 (11%)              | 13 (11%)              | 3 (10%)              | 12 (9%)               | 12 (9%)               | 6 (33.3%)            |
| <b>FAB subtype</b>             |                       |                       |                      |                       |                       |                      |
| M0                             | 6 (6%)                | 2 (2%)                | 0 (0%)               | 1 (1%)                | 1 (1%)                | 0 (0%)               |
| M1+M2                          | 44 (46%)              | 42 (46%)              | 16 (67%)             | 48 (47.5%)            | 46 (44%)              | 7 (54%)              |
| M3                             | 1 (1%)                | 0 (0%)                | 1 (4%)               | 0 (0%)                | 0 (0%)                | 0 (0%)               |
| M4+M5                          | 43 (44%)              | 45 (50%)              | 7 (29%)              | 48 (47.5%)            | 52 (51%)              | 5 (38)               |
| M6+M7                          | 3 (3%)                | 2 (2%)                | 0 (0%)               | 4 (4%)                | 4 (4%)                | 1 (8%)               |
| Missing                        | 26 (21%)              | 29 (24%)              | 5 (17%)              | 27 (21%)              | 24 (19%)              | 5 (28%)              |
| <b>Type of AML</b>             |                       |                       |                      |                       |                       |                      |
| de novo                        | 110 (90%)             | 110 (91%)             | 26 (90%)             | 115 (90%)             | 113 (89%)             | 17 (94%)             |
| secondary                      | 7 (6%)                | 8 (7%)                | 2 (7%)               | 10 (8%)               | 11 (9%)               | 1 (6%)               |
| therapy-related                | 5 (4%)                | 2 (2%)                | 1 (3%)               | 3 (2%)                | 3 (2%)                | 0 (0%)               |
| Missing                        | 1 (1%)                | 0 (0%)                | 0 (0%)               | 0 (0%)                | 0 (0%)                | 0 (0%)               |
| <b>ELN 2010</b>                |                       |                       |                      |                       |                       |                      |
| Favorable                      | 84 (74%)              | 81 (78%)              | 18 (70%)             | 80 (68%)              | 93 (81%)              | 11 (65%)             |
| Intermediate-I                 | 16 (14%)              | 12 (12%)              | 4 (15%)              | 18 (15%)              | 11 (10%)              | 5 (29%)              |
| Intermediate-II                | 13 (11%)              | 8 (8%)                | 4 (15%)              | 18 (15%)              | 10 (9%)               | 1 (6%)               |
| Adverse                        | 1 (1%)                | 2 (2%)                | 0 (0%)               | 2 (2%)                | 0 (0%)                | 0 (0%)               |
| Missing                        | 9 (7%)                | 17 (14%)              | 3 (10%)              | 10 (8%)               | 13 (10%)              | 1 (6%)               |
| <b>HSCT</b>                    |                       |                       |                      |                       |                       |                      |
| no                             | 79 (64%)              | 85 (71%)              | 23 (79%)             | 103 (81%)             | 97 (76%)              | 13 (72%)             |
| yes                            | 44 (36%)              | 35 (29%)              | 6 (21%)              | 25 (19%)              | 30 (23%)              | 5 (28%)              |

| <b>HSCT Type</b>                      |                     |                     |                     |                     |                     |                     |
|---------------------------------------|---------------------|---------------------|---------------------|---------------------|---------------------|---------------------|
| Matched related                       | 9 (21%)             | 11 (32%)            | 1 (17%)             | 7 (28%)             | 7 (23%)             | 2 (40%)             |
| Matched unrelated                     | 33 (79%)            | 20 (59%)            | 5 (83%)             | 18 (72%)            | 23 (77%)            | 3 (60%)             |
| Haploidentical                        | 0 (0%)              | 3 (9%)              | 0 (0%)              | 0 (0%)              | 0 (0%)              | 0 (0%)              |
| Missing                               | 81 (66%)            | 86 (72%)            | 23 (79%)            | 103 (81%)           | 97 (76%)            | 13 (72%)            |
| <b>HSCT-Phase</b>                     |                     |                     |                     |                     |                     |                     |
| CR1                                   | 14 (34%)            | 13 (40%)            | 2 (33%)             | 14 (56%)            | 14 (47%)            | 2 (40%)             |
| CR2                                   | 11 (26%)            | 12 (38%)            | 3 (50 %)            | 7 (28%)             | 5 (17%)             | 1 (20%)             |
| PR1                                   | 1 (2%)              | 0 (0%)              | 0 (0%)              | 0 (0%)              | 1 (3%)              | 0 (0%)              |
| RD1                                   | 1 (2%)              | 1 (3%)              | 0 (0%)              | 0 (0%)              | 0 (0%)              | 0 (0%)              |
| Relapse1                              | 14 (34%)            | 6 (19%)             | 1 (17%)             | 4 (16%)             | 10 (33%)            | 2 (40%)             |
| Relapse2                              | 1 (2%)              | 0 (0%)              | 0 (0%)              | 0 (0%)              | 0 (0%)              | 0 (0%)              |
| Missing                               | 81 (66%)            | 88 (73%)            | 23 (79%)            | 103 (81%)           | 97 (76%)            | 13 (72%)            |
| <b>Peripheral blood blasts</b>        |                     |                     |                     |                     |                     |                     |
| Mean (SD)                             | 34.7 (32.7)         | 38.1 (34.0)         | 44.2 (34.3)         | 38.3 (33.0)         | 34.4 (31.2)         | 35.6 (32.6)         |
| Median [Min, Max]                     | 24.0<br>[0, 99.0]   | 32.0<br>[0, 98.0]   | 39.0<br>[0, 97.0]   | 30.0<br>[0, 99.0]   | 26.0<br>[0, 97.0]   | 29.0<br>[0, 88.0]   |
| Missing                               | 6 (5%)              | 3 (2 %)             | 0 (0%)              | 5 (4%)              | 7 (6%)              | 1 (6%)              |
| <b>Bone marrow blasts</b>             |                     |                     |                     |                     |                     |                     |
| Mean (SD)                             | 65.6 (23.5)         | 67.6 (24.9)         | 63.5 (27.6)         | 68.7 (25.4)         | 64.0 (24.5)         | 66.8 (26.8)         |
| Median [Min, Max]                     | 70.0<br>[16.0, 100] | 79.0<br>[20.0, 100] | 80.0<br>[3.0, 94.0] | 80.0<br>[0, 100]    | 70.0<br>[0, 100]    | 72.5<br>[15.0, 100] |
| Missing                               | 5 (4%)              | 5 (4%)              | 0 (0%)              | 3 (2%)              | 4 (3%)              | 2 (11%)             |
| <b>WBC count (x 10<sup>9</sup>/l)</b> |                     |                     |                     |                     |                     |                     |
| Mean (SD)                             | 39.9 (46.4)         | 42.0 (55.0)         | 45.1 (53.9)         | 40.1 (49.9)         | 33.1 (47.6)         | 27.0 (21.1)         |
| Median [Min, Max]                     | 23.4<br>[0.7, 243]  | 20.2<br>[0.6, 296]  | 23.3<br>[1.4, 207]  | 20.2<br>[0.9, 251]  | 15.6<br>[0.6, 254]  | 30.4<br>[2.1, 64.7] |
| <b>Hemoglobin (g/L)</b>               |                     |                     |                     |                     |                     |                     |
| Mean (SD)                             | 9.34 (1.98)         | 9.61 (1.80)         | 9.20 (1.65)         | 9.24 (1.81)         | 9.15 (1.86)         | 9.29 (1.43)         |
| Median [Min, Max]                     | 9.25<br>[4.3, 19.3] | 9.40<br>[5.5, 14.6] | 8.80<br>[6.2, 12.4] | 8.75<br>[5.8, 15.0] | 9.10<br>[4.4, 13.1] | 9.35<br>[7.0, 12.1] |
| Missing                               | 1 (1%)              | 0 (0%)              | 0 (0%)              | 0 (0%)              | 0 (0%)              | 0 (0%)              |
| <b>Platelet count</b>                 |                     |                     |                     |                     |                     |                     |
| Mean (SD)                             | 97.6 (82.4)         | 103 (100)           | 77.5 (67.0)         | 84.0 (69.3)         | 102 (72.6)          | 64.8 (33.9)         |
| Median [Min, Max]                     | 75.0<br>[9.0, 533]  | 72.0<br>[12.0, 660] | 56.0<br>[16.0, 376] | 64.5<br>[7.0, 314]  | 91.0<br>[13.0, 404] | 59.0<br>[15.0, 134] |
| Missing                               | 0 (0%)              | 0 (0%)              | 0 (0%)              | 0 (0%)              | 1 (1%)              | 0 (0%)              |
| <b>LDH</b>                            |                     |                     |                     |                     |                     |                     |
| Mean (SD)                             | 554 (330)           | 605 (502)           | 572 (346)           | 667 (1090)          | 533 (417)           | 657 (577)           |
| Median [Min, Max]                     | 454<br>[147, 1630]  | 442<br>[86.0, 3100] | 469<br>[210, 1490]  | 421<br>[151, 9670]  | 438<br>[137, 3120]  | 409<br>[250, 2420]  |
| Missing                               | 2 (2%)              | 0 (0%)              | 0 (0%)              | 1 (1%)              | 0 (0%)              | 0 (0%)              |
| <b>Cytogenetics by MRC</b>            |                     |                     |                     |                     |                     |                     |
| Favorable                             | 0 (0%)              | 0 (0%)              | 0 (0%)              | 0 (0%)              | 0 (0%)              | 0 (0%)              |

|                                             |           |           |           |           |            |           |
|---------------------------------------------|-----------|-----------|-----------|-----------|------------|-----------|
| Intermediate                                | 115 (99%) | 113 (99%) | 29 (100%) | 126 (98%) | 121 (100%) | 17 (100%) |
| Adverse                                     | 1 (1%)    | 1 (1%)    | 0 (0%)    | 2 (2%)    | 0 (0%)     | 0 (0%)    |
| Missing                                     | 7 (6%)    | 6 (5%)    | 0 (0%)    | 0 (0%)    | 6 (5%)     | 1 (6%)    |
| <b><i>FLT3</i>-ITD</b>                      |           |           |           |           |            |           |
| Wildtype                                    | 102 (83%) | 98 (82%)  | 23 (79%)  | 106 (83%) | 109 (86%)  | 13 (72%)  |
| Mutated                                     | 21 (17%)  | 22 (18%)  | 6 (21%)   | 22 (17%)  | 18 (14%)   | 5 (28%)   |
| <b><i>FLT3</i>-TKD</b>                      |           |           |           |           |            |           |
| Wildtype                                    | 107 (87%) | 110 (92%) | 23 (79%)  | 108 (84%) | 111 (87%)  | 17 (94%)  |
| Mutated                                     | 16 (13%)  | 10 (8%)   | 6 (21%)   | 20 (16%)  | 16 (13%)   | 1 (6%)    |
| <b><i>NPM1/FLT3</i> mutation risk group</b> |           |           |           |           |            |           |
| High risk                                   | 21 (17%)  | 22 (18%)  | 6 (21%)   | 22 (17%)  | 18 (14%)   | 5 (28%)   |
| How risk                                    | 102 (83%) | 98 (82%)  | 23 (79%)  | 106 (83%) | 109 (86%)  | 13 (72%)  |
| <b><i>DNMT3A</i></b>                        |           |           |           |           |            |           |
| Wildtype                                    | 47 (52%)  | 49 (59%)  | 15 (75%)  | 40 (46%)  | 48 (57%)   | 6 (55%)   |
| Mutated                                     | 43 (48%)  | 34 (41%)  | 5 (25%)   | 46 (54%)  | 37 (43%)   | 5 (45%)   |
| Missing                                     | 33 (27%)  | 37 (31%)  | 9 (31%)   | 42 (33%)  | 42 (33%)   | 7 (39%)   |

Abbreviations: AML, acute myeloid leukemia; CR, complete remission; *DNMT3A*, DNA methyltransferase 3A; ECOG, Eastern Cooperative Oncology Group; ELN, European Leukemia Net; FAB, French-American-British; *FLT3*-ITD, FMS-like tyrosine kinase 3 gene internal tandem duplication; *FLT3*-TKD, FMS-like tyrosine kinase 3 gene tyrosine kinase domain mutation; GO, Gemtuzumab ozogamicin; HSCT, hematopoietic stem cell transplantation; LDH, lactate dehydrogenase; MRC, Medical Research Council; *NPM1*, nucleophosmin1; PR, partial remission; RD, resistant disease; Secondary AML, AML after previous myelodysplastic syndrome or myeloproliferative neoplasm; WBC, white blood cell count

**Supplemental Figure 1:** Time to hematological recovery in the two treatment arms according to the three genotypes A) after first induction cycle and B) after second induction cycle.

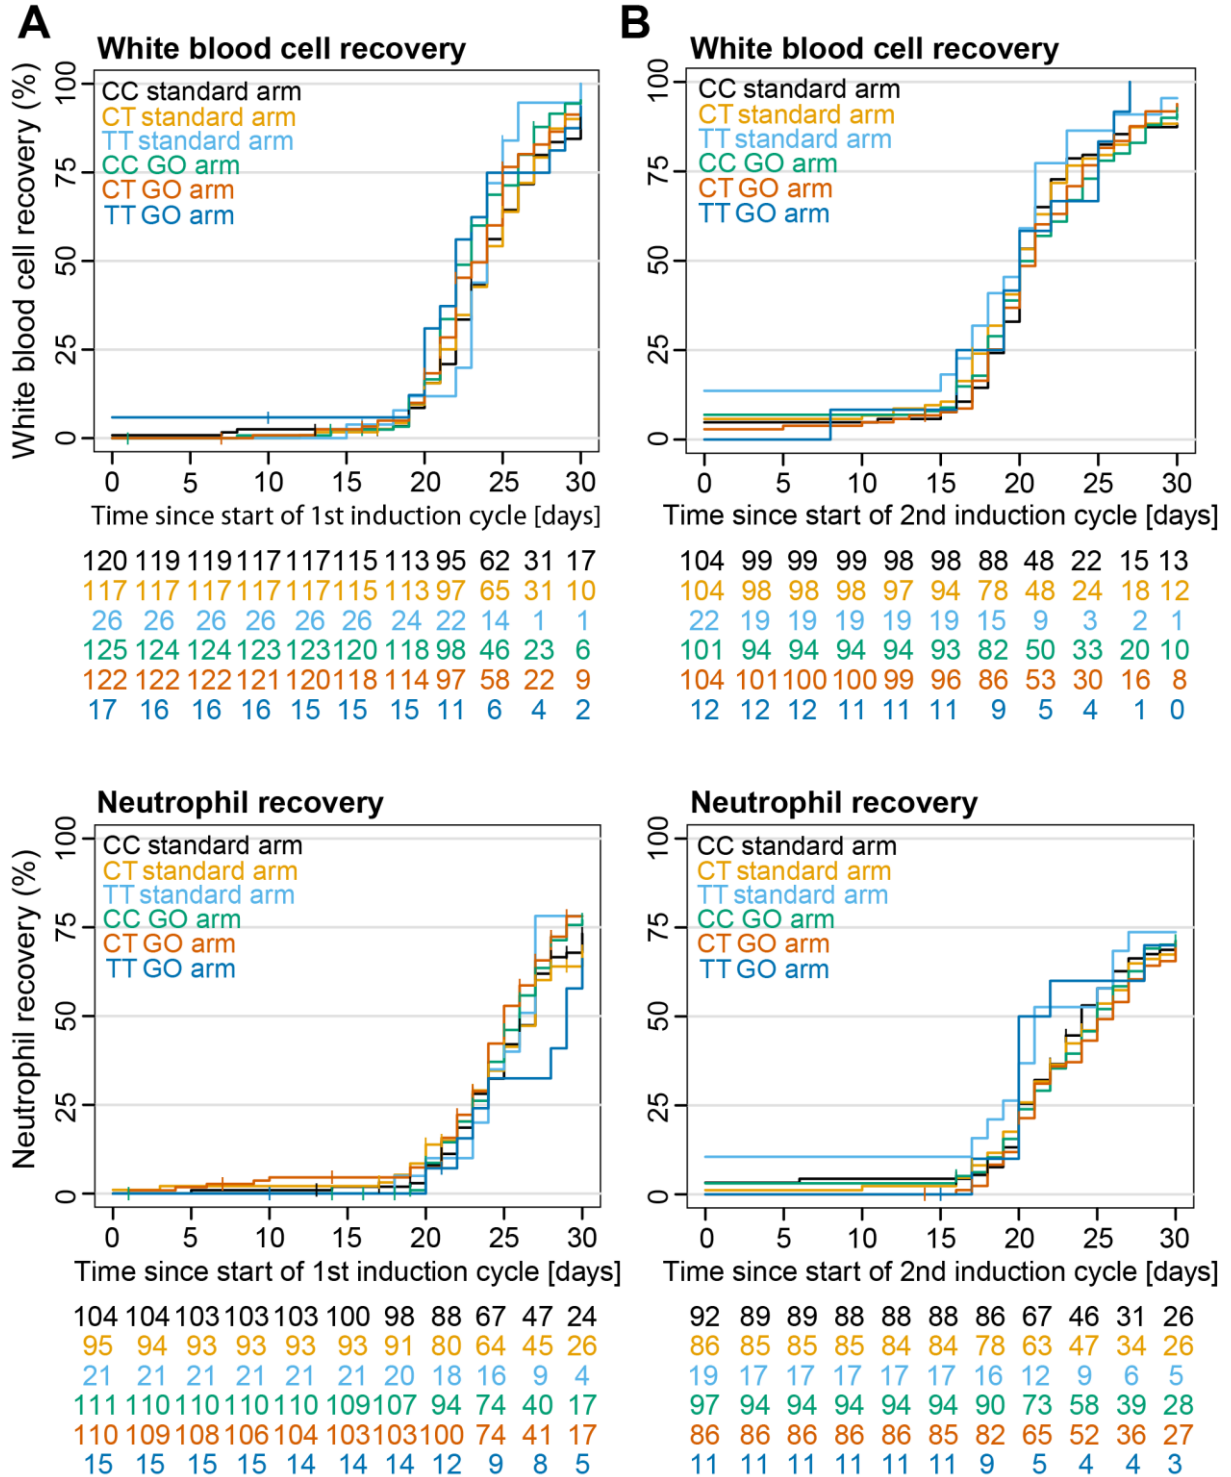

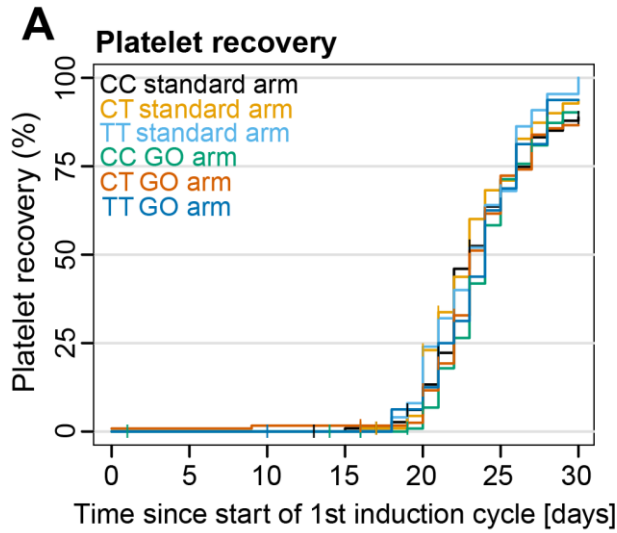

118 118 118 118 118 116 113 97 51 27 13  
 115 115 115 115 115 115 112 86 44 19 8  
 26 26 26 26 26 26 25 19 12 3 1  
 124 123 123 123 123 122 120 109 67 28 10  
 121 120 120 120 119 119 118 105 56 29 15  
 17 17 17 17 16 16 16 14 9 3 1

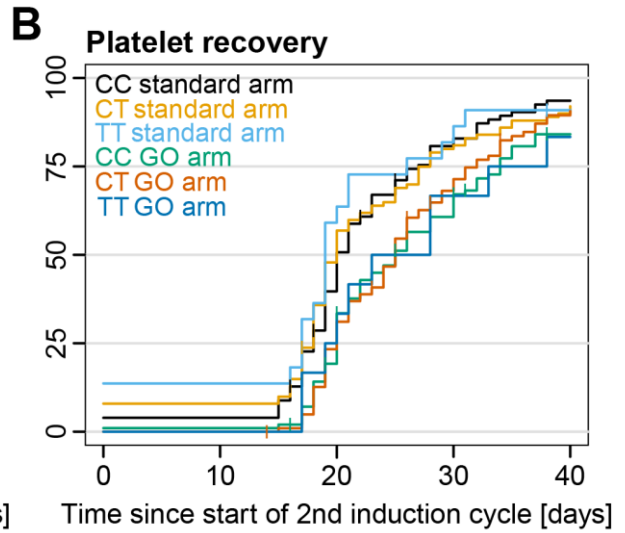

102 98 98 98 93 60 32 23 16 9 6  
 101 93 93 93 91 52 36 25 17 12 10  
 22 19 19 19 19 9 6 5 2 2 1  
 100 99 99 99 98 79 53 41 28 17 12  
 104 104 104 104 102 79 60 35 23 14 9  
 12 12 12 12 12 9 6 6 4 3 2

**Supplemental Figure 2: Separate analysis comparing GO vs. Standard arm for female (A) and male (B) patients in the three subgroups defined by the genotypes with regard to the endpoints event-free survival (EFS) and relapse-free survival (RFS).** There was no significant correlation of the SNP with age or sex. Analysis of EFS and RFS for female patients (A) showed a trend towards a genotype-independent benefit in female patients treated with GO whereas male patients (B) show a trend to better EFS and RFS only for c.41 C/C genotype.

**A**

**Treatment effect of GO vs. Standard by CD33 SNP Genotype for female patients**

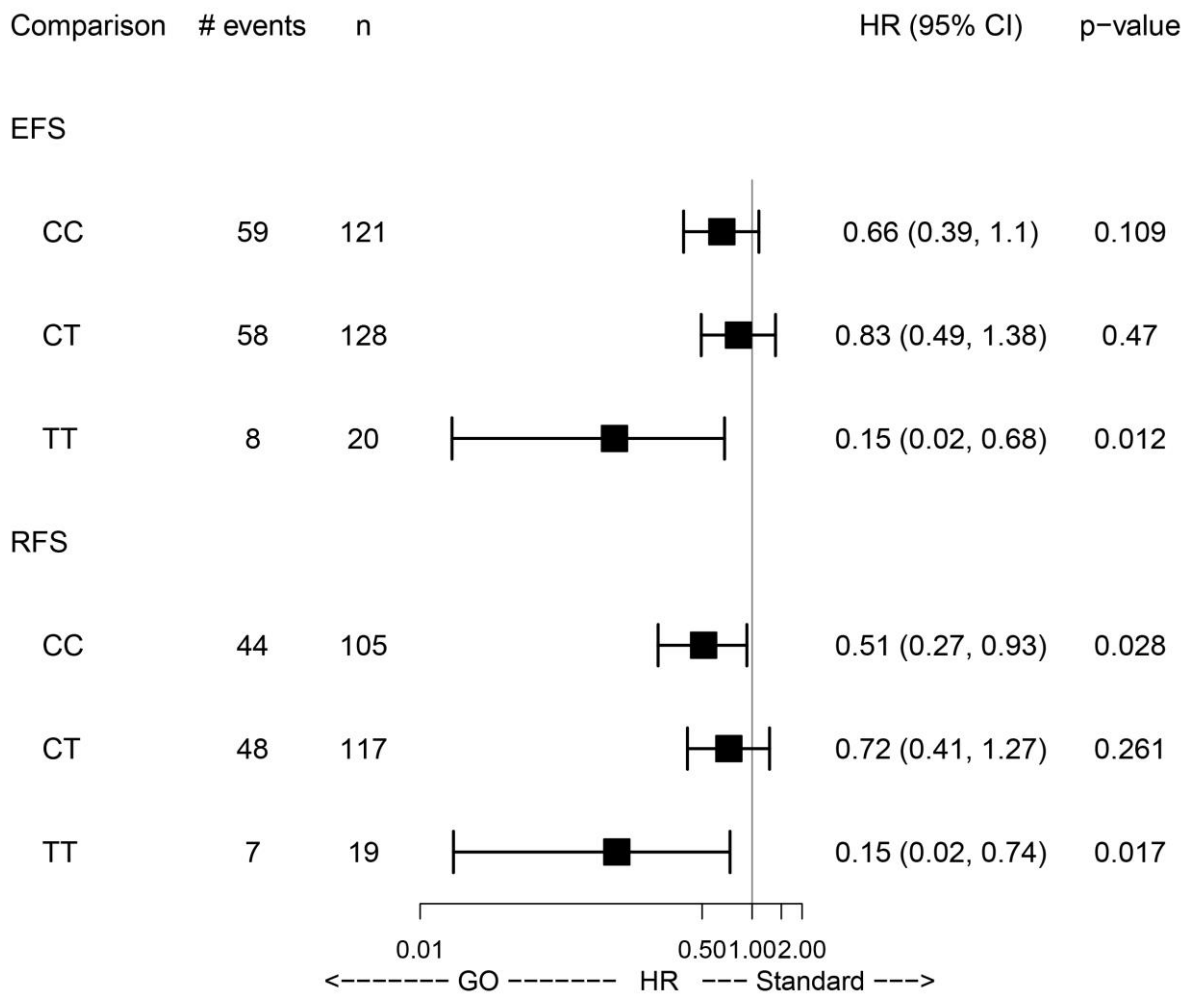

**B**

**Treatment effect of GO vs. Standard by CD33 SNP Genotype for male patients**

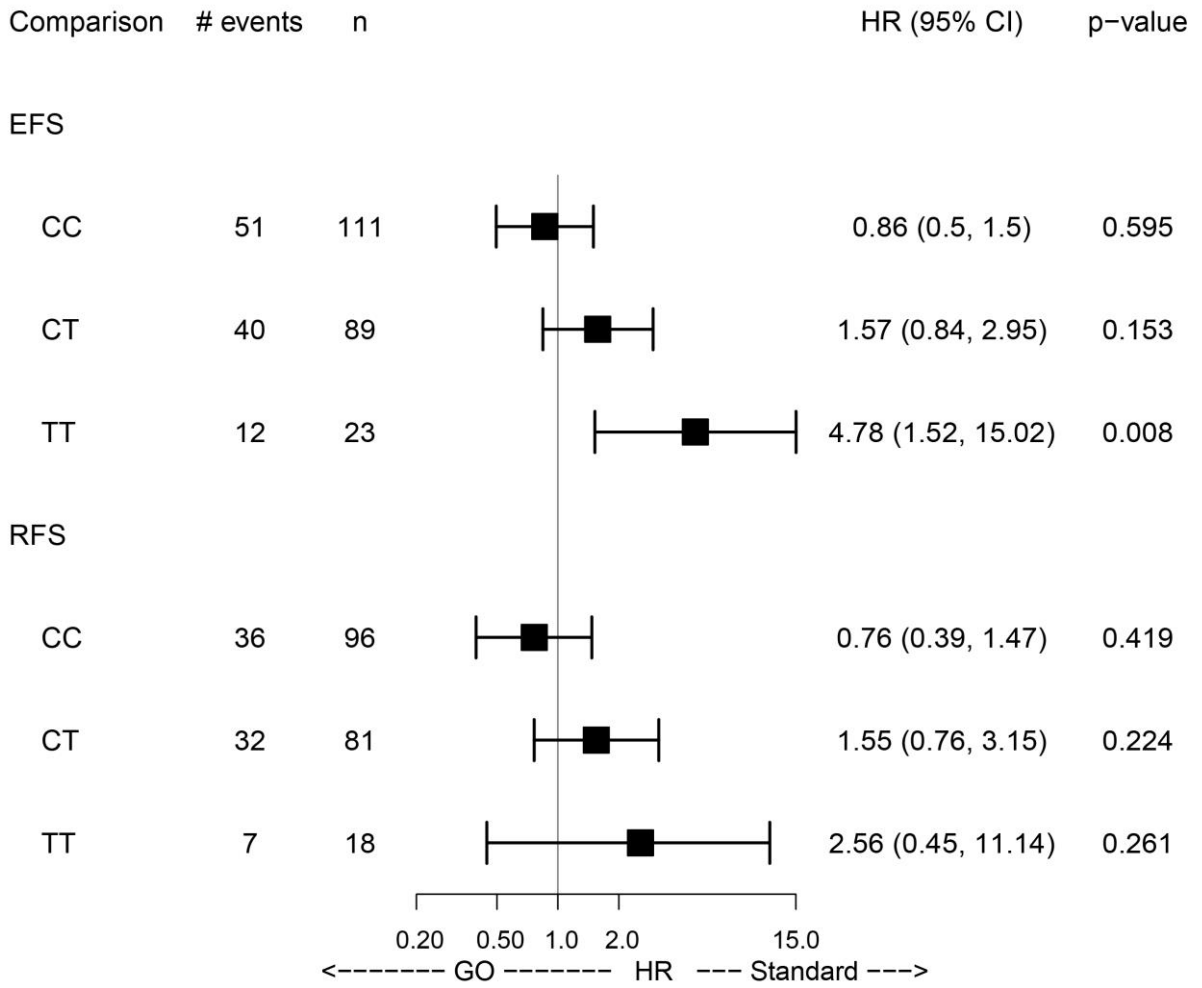

Supplement: 2021_278894_TEICH_SUPPL.pdf [file 2021_278894_TEICH_SUPPL.pdf]
